# Supplementary material
Source: PubMed Central journal article supplement (PMC2832994)
Supplement: supp_M109.075036_jbc.M109.075036-1.pdf [file supp_M109.075036_jbc.M109.075036-1.pdf]

## Supplemental figure 1

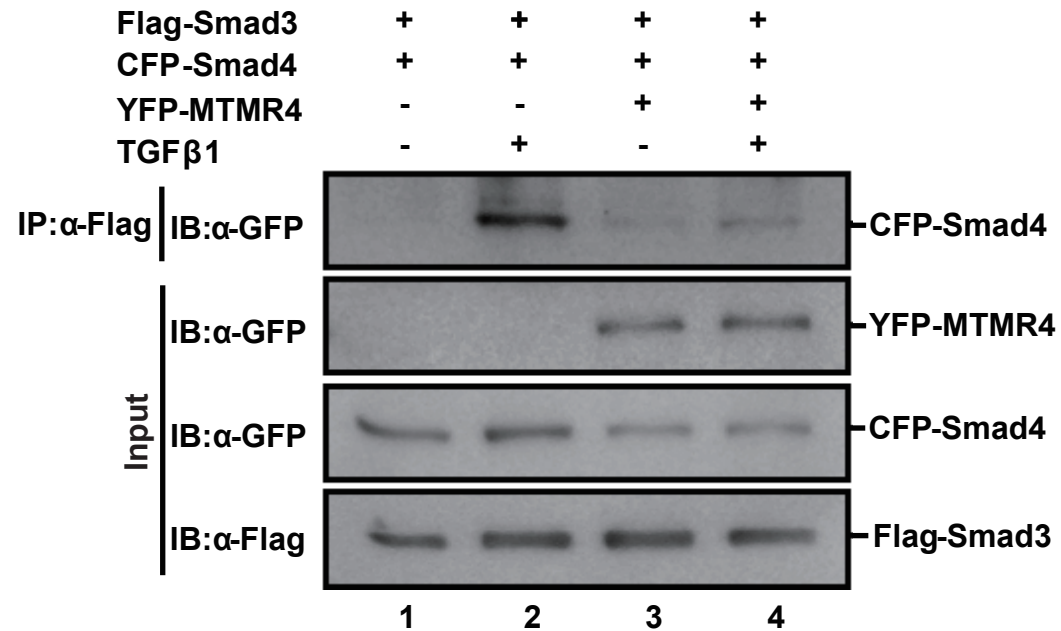

**Supplemental figure 1.** MTMR4 reduces Smad3-Smad4 complex formation. 293T cells cotransfected with pYFP-MTMR4 and pXFIF-Smad3 or pECFP-Smad4 (1  $\mu$ g each) were treated with or without TGF- $\beta$ 1 for 2h. Cell lysates were immunoprecipitated with an anti-Flag antibody and interactions between Smad4 and Smad3 were detected by immunoblotting with an anti-GFP antibody (top panel). Protein expression levels of Smad3, Smad4 and MTMR4 were verified using the antibodies as indicated (input).

# Supplemental Table 1

The oligonucleotide sequences of primers used to construct plasmids

| Primers              | DNA Sequences (5'-3')              |
|----------------------|------------------------------------|
| MTMR4-Forward        | CCGCTCGAGCGATGGGTGAGGAGGGGCCCCC    |
| MTMR4-Reverse        | CGGGGTACCTCAACTGGAAGCTGTAGCAA      |
| MTMR4-ΔFYVE1-Forward | CCGCTCGAGCGATGGGTGAGGAGGGGCCCCC    |
| MTMR4-ΔFYVE1-Reverse | CGGGGTACCTCAAGTCTCTTTCTTATCAACAG   |
| MTMR4-ΔFYVE2-Forward | CCGCTCGAGCGATGGGTGAGGAGGGGCCCCC    |
| MTMR4-ΔFYVE2-Reverse | CGGGGTACCTCACACTGGGGAAAGGTAAAGA    |
| MTMR4-ΔDSP-Forward   | CCGCTCGAGCGATGGGTGAGGAGGGGCCCCC    |
| MTMR4-ΔDSP-Reverse   | CGGGGTACCTCAACTCTCCAGTGCCGACAACC   |
| FYVE1-Forward        | CCGCTCGAGCGATGCATAGGTTACGGCAAATCGA |
| FYVE1-Reverse        | CGGGGTACCTCAGACTTGAATGTGTTTCGTAAC  |
| FYVE2-Forward        | CCGCTCGAGCGATGGAGGTGACTCGCTGGGTTC  |
| FYVE2-Reverse        | CGGGGTACCTCAGACTTGAATGTGTTTCGTAAC  |
| MTMR4-C407S-Forward  | CCGGCCTGTGCTGGTACACTCTTCAGATGGCTG  |
| MTMR4-C407S-Reverse  | CAGCCATCTGAAGAGTGTACCAGCACAGGCCGG  |
| Smad2-Forward        | CCGCTCGAGCGATGTCGTCCATCTTGCCATT    |
| Smad2-Reverse        | CGGGGTACCTTATGACATGCTTGAGCAAC      |
| Smad3-Forward        | CCGCTCGAGCGATGTCGTCCATCCTGCCTTT    |
| Smad3-Reverse        | CGGGGTACCCTAAGACACACTGGAACAGC      |
| Smad4-Forward        | CCGCTCGAGCGATGGACAATATGTCTATTACG   |
| Smad4-Reverse        | CGGGGTACCTCAGTCTAAAGGTTGTGGGT      |
